# Supplementary material
Source: PubMed Central journal article supplement (PMC9793596)
Supplement: NIHMS1846406-supplement-Supplemental_Table.pdf [file NIHMS1846406-supplement-Supplemental_Table.pdf]

Supplemental Table 1: Characteristics of enrolled RCTs

| Study, Year, Country           | Population                                              | Population characteristics                                                    | Intervention                                                                                                                      | Control           | Follow-up   | Outcomes                                     | Notes                                             |
|--------------------------------|---------------------------------------------------------|-------------------------------------------------------------------------------|-----------------------------------------------------------------------------------------------------------------------------------|-------------------|-------------|----------------------------------------------|---------------------------------------------------|
| Bliss et al.<br>1996, USA      | Chronic renal failure                                   | n=16<br>Age=20-72<br>Men(%)=62.50                                             | Prebiotic<br>50 g/day gum arabic fiber<br>(n=16)                                                                                  | Placebo<br>(n=16) | 1 month     | Scr (mg/dl)<br>BUN (mg/dl)                   | Single-blind,<br>crossover<br>Dropout rate 20.00% |
| Hassan et al.<br>2006, France  | Chronic renal failure                                   | n=9<br>Age=67.7±11.5<br>Men(%)=33.33                                          | Prebiotic<br>40 g/day Fermentable Carbohydrate<br>(n=9)                                                                           | Placebo<br>(n=9)  | 1.25 months | Scr (mg/dl)<br>BUN (mg/dl)                   | Double-blind,<br>crossover<br>Dropout rate 0%     |
| Ranganathan et al.<br>2009 USA | stage 3-4 CKD (eGFR 15 - 59mL/min/1.73m <sup>2</sup> )  | n=13<br>Age=55±8.8<br>Men(%)=27.27<br>Hypertension(%)=84.62                   | Probiotic<br>(L.acidophilus KB31, B. longum KB35, and S. thermophilus KB27)<br>3*10 <sup>10</sup> CFU/day<br>(n=13)               | Placebo<br>(n=13) | 3 months    | Scr (mg/dl)<br>BUN (mg/dl)<br>CRP (mg/dl)    | Double-blind,<br>crossover<br>Dropout rate 18.75% |
| B Guida et al. 2014, Italy     | stage 3-4 CKD (eGFR 15 - 60mL/min/1.73 m <sup>2</sup> ) | n=30<br>Age=59.5±13.1<br>Men (%)=86.67<br>BMI (kg/m <sup>2</sup> )=27.20±3.02 | Synbiotic with probiotics<br>1.9*10 <sup>10</sup> CFU/day and prebiotic (2.2g/day of inulin and 1.3 g resistant starch)<br>(n=18) | Placebo<br>(n=12) | 1 month     | p-CS (mg/L)                                  | Double-blind<br>No dropouts                       |
| Daniela et al. 2014, Mexico    | HD≥ 3 months                                            | n=35<br>Age=39.84±19.40<br>Men (%)=72.73                                      | Synbiotic with probiotics<br>11*10 <sup>6</sup> CFU/day and 2.31 g prebiotic                                                      | Placebo<br>(n=15) | 2 months    | BUN (mg/dl)<br>Scr (mg/dl)<br>Albumin (g/dl) | Double-blind<br>Dropout rate = 16.67%             |

|                                    |              |                                                                                                                  |                                                                                                                 |                   |               |                                                                                                         |                                                   |
|------------------------------------|--------------|------------------------------------------------------------------------------------------------------------------|-----------------------------------------------------------------------------------------------------------------|-------------------|---------------|---------------------------------------------------------------------------------------------------------|---------------------------------------------------|
|                                    |              | HTN(%)=6.82<br>DM(%)=16.67<br>HD vintage (years) = 5.03±2.80                                                     | inulin and 1.3 g resistant starch<br>(n=20)                                                                     |                   |               | CRP (mg/dl)<br>IL-6 (pg/mL)<br>TC (mg/dl)<br>TG (mg/dl)<br>HDL (mg/dl)<br>LDL (mg/dl)                   |                                                   |
| Ranganatha<br>n et al.<br>2014 USA | HD patients  | n=22<br>Age=54±13.09<br>Men(%)=69.23<br>SBP(mmHg)=146.87±23.04<br>DBP(mmHg)=77.70±15.19                          | Probiotic (S.thermoophilus KB 19,<br>L.acidophilus KB 27; B. longum KB 31)<br>30 billion CFU/day<br>(n=22)      | Placebo<br>(n=13) | 2 months      | CRP (mg/dl)                                                                                             | Double-blind,<br>crossover<br>Dropout rate 21.43% |
| Tammy et al.<br>2014, USA          | HD           | n=40<br>Age=56±13.49<br>Men (%)=60<br>HD vintage (years) =~4<br>BMI (kg/m <sup>2</sup> )=29±6.44<br>DM (%)=45    | Prebiotics<br>15 g of high-amylose corn starch with 40%<br>digestible starch and 60% resistant starch<br>(n=20) | Placebo<br>(n=20) | 1.5<br>months | BUN (mg/dl)<br>Albumin (g/dl)<br>p-CS (mg/dl)<br>IS (mg/dl)<br>CRP (mg/dl)                              | Single-blinded<br>Dropout rate = 21.15%           |
| Mikiko et al.<br>2015 Japan        | HD≥ 6 months | n=29<br>Age=66.87±8.78<br>Men(%)=65.52<br>BMI (kg/m <sup>2</sup> )= 22.02±4.04<br>HD vintage (years) = 9.13±8.27 | Prebiotic<br>10g polydextrose/day<br>(n=16)                                                                     | Placebo<br>(n=13) | 1 month       | Scr (mg/dl)<br>BUN (mg/dl)<br>TC (mg/dl)<br>TG (mg/dl)<br>HDL (mg/dl)<br>LDL (mg/dl)<br>Albumin (mg/dl) | Double-blind<br>Dropout rate 23.68%               |

|                                   |                                                                                                 |                                                                                                                                                                   |                                                                                                                                                       |                   |            |                                                                                                   |                                                   |
|-----------------------------------|-------------------------------------------------------------------------------------------------|-------------------------------------------------------------------------------------------------------------------------------------------------------------------|-------------------------------------------------------------------------------------------------------------------------------------------------------|-------------------|------------|---------------------------------------------------------------------------------------------------|---------------------------------------------------|
| Wang et al.<br>2015, China        | PD ≥ 1 month                                                                                    | n=39<br>Age=50.16±13.56<br>Men (%)=46.15<br>HTN(%)=82.05<br>DM(%)=20.51<br>PD vintage(years)=3.44<br>(0.17-10.33)<br>BMI(kg/m <sup>2</sup> )=22.75 (19.8 to 25.8) | probiotics<br>4*10 <sup>9</sup> CFU/day<br>(n=21)                                                                                                     | Placebo<br>(n=18) | 6 m        | BUN (mg/dl)<br>Scr (mg/dl)<br>IL-6 (pg/ml)                                                        | Double-blind<br>Dropout rate = 17.02%             |
| Megan et al.<br>2016<br>Australia | Predialysis adult<br>participants with CKD<br>(eGFR=10 - 30 ml/min<br>per 1.73 m <sup>2</sup> ) | n=31<br>Age=69±10<br>Men(%)=56.76<br>BMI (kg/m <sup>2</sup> )= 29±6<br>Hypertension(%)=100.00<br>Hyperlipidemia(%)=78.00                                          | Symbiotic (inulin, fructo-oligosaccharides,<br>and GOS and Lactobacillus, Bidifobacteria,<br>and Streptococcus genera) 90 bllion<br>CFU/day<br>(n=31) | Placebo<br>(n=31) | 1.5 months | Scr (mg/dl)<br>IS (mg/L)<br>p-CS (mg/L)<br>IL-6 (pg/mL)                                           | Double-blind,<br>crossover<br>Dropout rate 16.22% |
| Hamideh et<br>al. 2016 Iran       | stage 3-4 CKD(eGFR 15<br>- 59mL/min/1.73m <sup>2</sup> )                                        | n=66<br>Age=61.00±7.65<br>Men(%)=75.76<br>BMI (kg/m <sup>2</sup> )= 28.52±4.06<br>Hypertension(%)=83.33<br>Hyperlipidemia(%)=80.30                                | Synbiotic<br>500mg (7 strains of probiotics and<br>prebiotics Fructooligosaccharides)<br>(n=31)                                                       | Placebo<br>(n=35) | 1.5 months | Scr (mg/dl)<br>eGFR (ml/min/1.73 m <sup>2</sup> )<br>BUN (mg/dl)                                  | Double-blind<br>Dropout rate 12.00%               |
| Alireza et al.<br>2017, Iran      | HD ≥ 12 months                                                                                  | n=60<br>Age=56.7±16.1<br>Men (%)=66.67<br>BMI (kg/m <sup>2</sup> )=26.25±6.01<br>HD vintage (years) = 3.55±1.1                                                    | Probiotics<br>6*10 <sup>10</sup> CFU/g/day<br>(n=30)                                                                                                  | Placebo<br>(n=30) | 3 months   | eGFR(ml/min/1.73 m <sup>2</sup> )<br>BUN (mg/dl)<br>Scr (mg/dl)<br>Albumin (g/dl)<br>TAC (mmol/L) | Double-blind<br>Dropout rate = 8.33%              |

|                                     |                                                       |                                                                                                                                            |                                                                              |                   |          |                                                                                                                                                                                          |                                                                        |                                       |
|-------------------------------------|-------------------------------------------------------|--------------------------------------------------------------------------------------------------------------------------------------------|------------------------------------------------------------------------------|-------------------|----------|------------------------------------------------------------------------------------------------------------------------------------------------------------------------------------------|------------------------------------------------------------------------|---------------------------------------|
|                                     |                                                       | CVD(%)=21.67<br>CAD(%)=78.33<br>HTN(%)=96.7                                                                                                |                                                                              |                   |          |                                                                                                                                                                                          | MDA (umol/L)<br>TC (mg/dl)<br>TG (mg/dl)<br>HDL (mg/dl)<br>LDL (mg/dl) |                                       |
| Zahra et al.<br>2017, Brazil        | >17 years of age,<br>undergoing 3-4h<br>dialysis/week | n=34<br>Age 33-46 and 47-60 > 60<br>years<br>Men (%)=55.6<br>HD vintage(years): 1-5.5                                                      | Probiotic 500mg/day; 3.09*10 <sup>10</sup> CFU<br>/day<br>(n=17)             | Placebo<br>(n=17) | 3 months | CRP                                                                                                                                                                                      |                                                                        | Double-blind<br>Dropout rate = 5.56%  |
| Christiane et<br>al 2018,<br>Brazil | CKD with eGFR<br><45mL/min/1.73 m <sup>2</sup>        | n=46<br>Age=57.31±14.65<br>Men (%)=54<br>BMI (kg/m <sup>2</sup> )=27.61±4.95                                                               | Prebiotic<br>(FOS, 12g/day)<br>(n=23)                                        | Placebo<br>(n=23) | 3 months | eGFR (ml/min/1.73 m <sup>2</sup> )<br>BUN (mg/dl)<br>Scr (mg/dl)<br>Albumin (g/dl)<br>p-CS (mg/dl)<br>IS (mg/dl)<br>IAA (ug/L)<br>TC (mg/dl)<br>TG (mg/dl)<br>HDL (mg/dl)<br>LDL (mg/dl) |                                                                        | Double-blind<br>Dropout rate = 8%     |
| Farzad et al.<br>2018, Iran         | HD≥ 3 months                                          | n=42<br>Age=58.36±14.39<br>Men (%)=76.19<br>HD vintage (years) = 2<br>BMI (kg/m <sup>2</sup> )=24.46±4.60<br>DM (%)=30.95<br>HTN (%)=40.48 | Probiotic (Lactobacillus Rhamnosus)<br>1.6*10 <sup>7</sup> CFU/day<br>(n=21) | Placebo<br>(n=21) | 1 month  | p-CS (mg/L)                                                                                                                                                                              |                                                                        | Triple-blind<br>Dropout rate = 28.81% |

|                |                    |                                       |                                    |         |             |                   |                       |
|----------------|--------------------|---------------------------------------|------------------------------------|---------|-------------|-------------------|-----------------------|
|                |                    | n=44                                  |                                    |         |             | Scr (mg/dl)       |                       |
|                |                    | Age=56±13                             |                                    |         |             | BUN (mg/dl)       |                       |
|                |                    | Men(%)=63.6                           | Prebiotic                          |         |             | Albumin (mg/dl)   |                       |
| Hamid et al.   | ESRD, HD≥ 6 months | BMI (kg/m <sup>2</sup> )= 23.58±2.07  | 20 g/day in first 4 weeks          | Placebo | 2 months    | IS (mg/L)         | Double-blind          |
| 2018, Iran     |                    | HD duration(years)=4.95±1.51          | 25 g/day in second 4 weeks         | (n=22)  |             | IL-6 (ng/mL)      | Dropout rate 4.35%    |
|                |                    | SBP(mmHg)=120±27.62                   | (n=22)                             |         |             | TAC (mmol/L)      |                       |
|                |                    | DBP(mmHg)=77±10.14                    |                                    |         |             | MDA (umol/L)      |                       |
|                |                    |                                       |                                    |         |             | TC (mg/dl)        |                       |
|                |                    |                                       |                                    |         |             | TG (mg/dl)        |                       |
|                |                    |                                       |                                    |         |             | HDL (mg/dl)       |                       |
|                |                    |                                       |                                    |         |             | Scr (mg/dl)       |                       |
|                |                    | n=31                                  |                                    |         |             | BUN               | Triple-blind          |
| Marta et al.   | HD≥ 6 months       | Age=54.71±9.70                        | Prebiotic                          | Placebo | 1 month     | Albumin (mg/dl)   |                       |
| 2018, Brazil   |                    | Men(%)=58.06                          | 16 g/day                           | (n=16)  |             | p-CS (mg/L)       | Dropout rate 18.42%   |
|                |                    | BMI (kg/m <sup>2</sup> )=26.60±5.14   | (n=15)                             |         |             | IS (mg/L)         |                       |
|                |                    | HD vintage(years)= 3.93±2.64          |                                    |         |             | IL-6 (pg/mL)      |                       |
|                |                    |                                       |                                    |         |             | SCr (mg/dl)       |                       |
|                |                    |                                       |                                    |         |             | BUN (mg/dl)       |                       |
|                |                    | n=33                                  | Probiotic                          | Placebo | 3 months    | p-CS (mg/L)       | Triple-blind          |
| Natália et al. | HD≥ 6 months       | Age=51.90±9.78                        | 9*10 <sup>8</sup> CFU /day         | (n=17)  |             | IS (mg/L)         | Dropout rate. 28.26%  |
| 2018, Brazil   |                    | Men (%)=63.64                         | (n=16)                             |         |             | IAA (ug/L)        |                       |
|                |                    | HD vintage (years) =-3.99             |                                    |         |             | CRP (mg/dl)       |                       |
|                |                    | BMI (kg/m <sup>2</sup> )=25.25±5.12   |                                    |         |             | IL-6 (pg/mL)      |                       |
|                |                    |                                       |                                    |         |             | CRP (mg/dl)       |                       |
|                |                    | n=58                                  | Probiotic                          | Placebo | 1.75 months | IL-6 (pg/mL)      | Blinded               |
| Rita et al.    | HD≥ 3 months       | Age=63.10±10.87                       | 100 mL of dairy drink with 40 g of | (n=29)  |             | MDA ( nmol/g ptn) | Dropout rate = 41.41% |
| 2018, Brazil   |                    | Men (%)=65.52                         | extruded sorghum flakes            |         |             | TAC (Mm trolox)   |                       |
|                |                    | BMI (kg/m <sup>2</sup> ) = 24.00±7.39 | (n=29)                             |         |             |                   |                       |

|                                      |                                    |                                                                                                                                                       |                                                                                                                                                                             |                   |                |                                                                                                                              |                                                     |  |
|--------------------------------------|------------------------------------|-------------------------------------------------------------------------------------------------------------------------------------------------------|-----------------------------------------------------------------------------------------------------------------------------------------------------------------------------|-------------------|----------------|------------------------------------------------------------------------------------------------------------------------------|-----------------------------------------------------|--|
|                                      |                                    | DM (%)=44.83<br>HTN (%)=50.00                                                                                                                         |                                                                                                                                                                             |                   |                |                                                                                                                              |                                                     |  |
| Alireza et al.<br>2019, Iran         | Diabetic patients<br>undergoing HD | n=60<br>Age=62.80±13.67<br>Men (%)=70<br>HD vintage (years) = 3.75±1.15<br>BMI (kg/m <sup>2</sup> )=26.65±5.03                                        | Synbiotic containing<br>probiotics<br>6*10 <sup>9</sup> CFU/day and 0.8g/day of a<br>prebiotic inulin<br>(n=30)                                                             | Placebo<br>(n=30) | 3 months       | TAC (mmol/L)<br>MDA (umol/L)<br>TC (mg/dl)<br>TG (mg/dl)<br>HDL (mg/dl)<br>LDL (mg/dl)<br>eGFR (ml/min/1.73 m <sup>2</sup> ) | Double-blind<br>No dropouts                         |  |
| Mariadelina<br>et al. 2019,<br>Italy | CKD3a                              | n=28<br>Age=59.75±5.83<br>Men (%)=54<br>BMI (kg/m <sup>2</sup> )=25.7±2.90                                                                            | Probiotic x 1 week then Bifiselle &<br>Ramnoselle x 2 weeks then Bifiselle &<br>Ramnoselle 2/day x 3 months (n=14)                                                          | Placebo<br>(n=14) | 3.75<br>months | CRP (mg/dl)<br>TC (mg/dl)<br>TG (mg/dl)<br>HDL (mg/dl)                                                                       | Double-blind<br>No dropouts                         |  |
| Li et al. 2020<br>China              | PD ≥ 3 months                      | n=15<br>Age=35.48±15.39<br>Men(%)=56.25<br>BMI (kg/m <sup>2</sup> )= 20.11±2.80<br>PD duration=2.27±2.64y                                             | Prebiotic<br>10 g/day inulin-type fructans.<br>(n=15)                                                                                                                       | Placebo<br>(n=15) | 3 months       | Scr (mg/dl)<br>eGFR (ml/min/1.73 m <sup>2</sup> )<br>IS (mg/L)<br>p-CS (mg/L)<br>Albumin (mg/dl)                             | Double-blind,<br>crossover<br>Dropout rate = 16.67% |  |
| Lim et al.<br>2020, China            | HD ≥ 6 month                       | n=50<br>Age=58.89±11.56<br>Men (%)=40.00<br>HTN(%)=66.00<br>DM(%)=50.00<br>HD vintage(years)=<br>5.94(0.5-14.25)<br>BMI(kg/m <sup>2</sup> )=24.5±4.17 | Probiotics Lactococcus lactis subsp. Lactis<br>LL358, Lactobaccillus salivarius LS159, and<br>Lactobaccillus pen- tosus LPE588 at high<br>dose (100 billion CFU/day) (n=25) | Placebo<br>(n=25) | 6 m            | Scr (mg/dl)<br>Albumin (g/dl)<br>p-CS (mg/dl)<br>IS (mg/l)<br>CRP (mg/l)<br>IL-6 (pg/mL)<br>TC (mg/dl)<br>TG (mg/dl)         | Double-blind<br>Dropout rate = 10.71%               |  |

BMI, body mass index; BUN, blood urea nitrogen; CAD, coronary artery disease; CVD, cerebrovascular disease; DBP, diastolic blood pressure; DM, diabetes mellitus; eGFR, estimated glomerular filtration rate; ESRD, end-stage renal disease; Hb, Hemoglobin; HD, hemodialysis; HDL, high-density lipoprotein; HTN, hypertension; p-CS, p-cresol sulfate; IAA, indole-3-acetic acid; IS, indoxyl sulfate; LDL, low-density lipoprotein MDA, malondialdehyde; PD, peritoneal dialysis; SBP, systolic blood pressure; Scr, serum creatinine; TAC, total anti-oxidative capacity; TG, triglyceride; UA, uric acid
