# Supplementary material
Source: PubMed Central journal article supplement (PMC9793596)

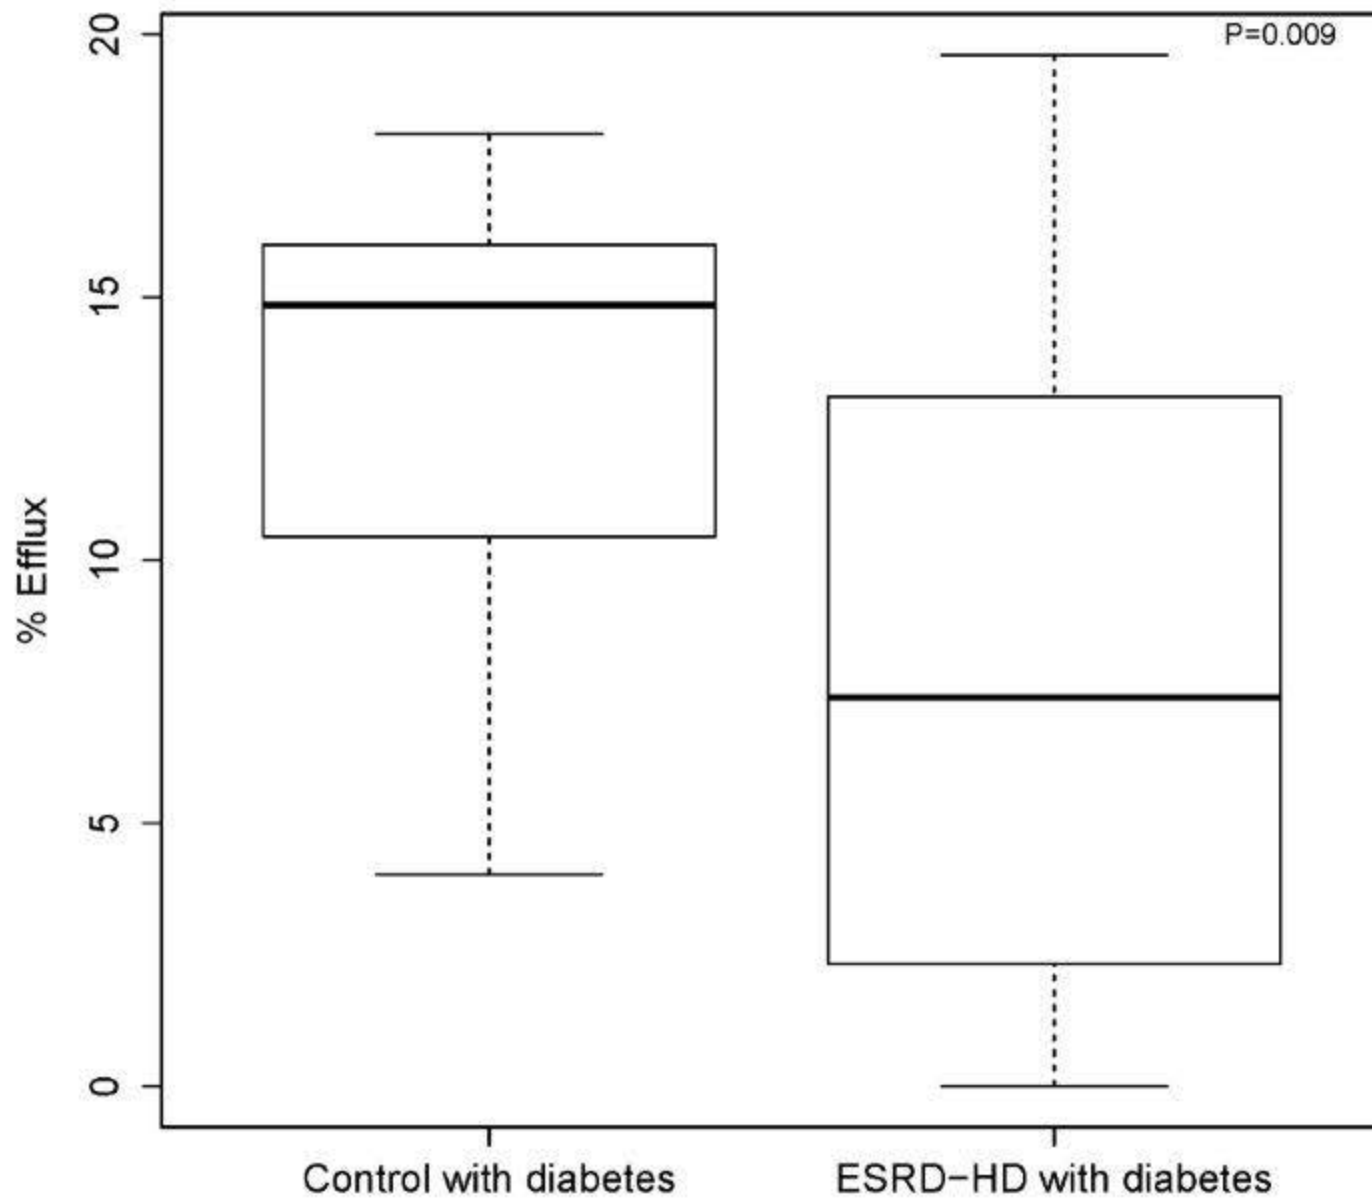

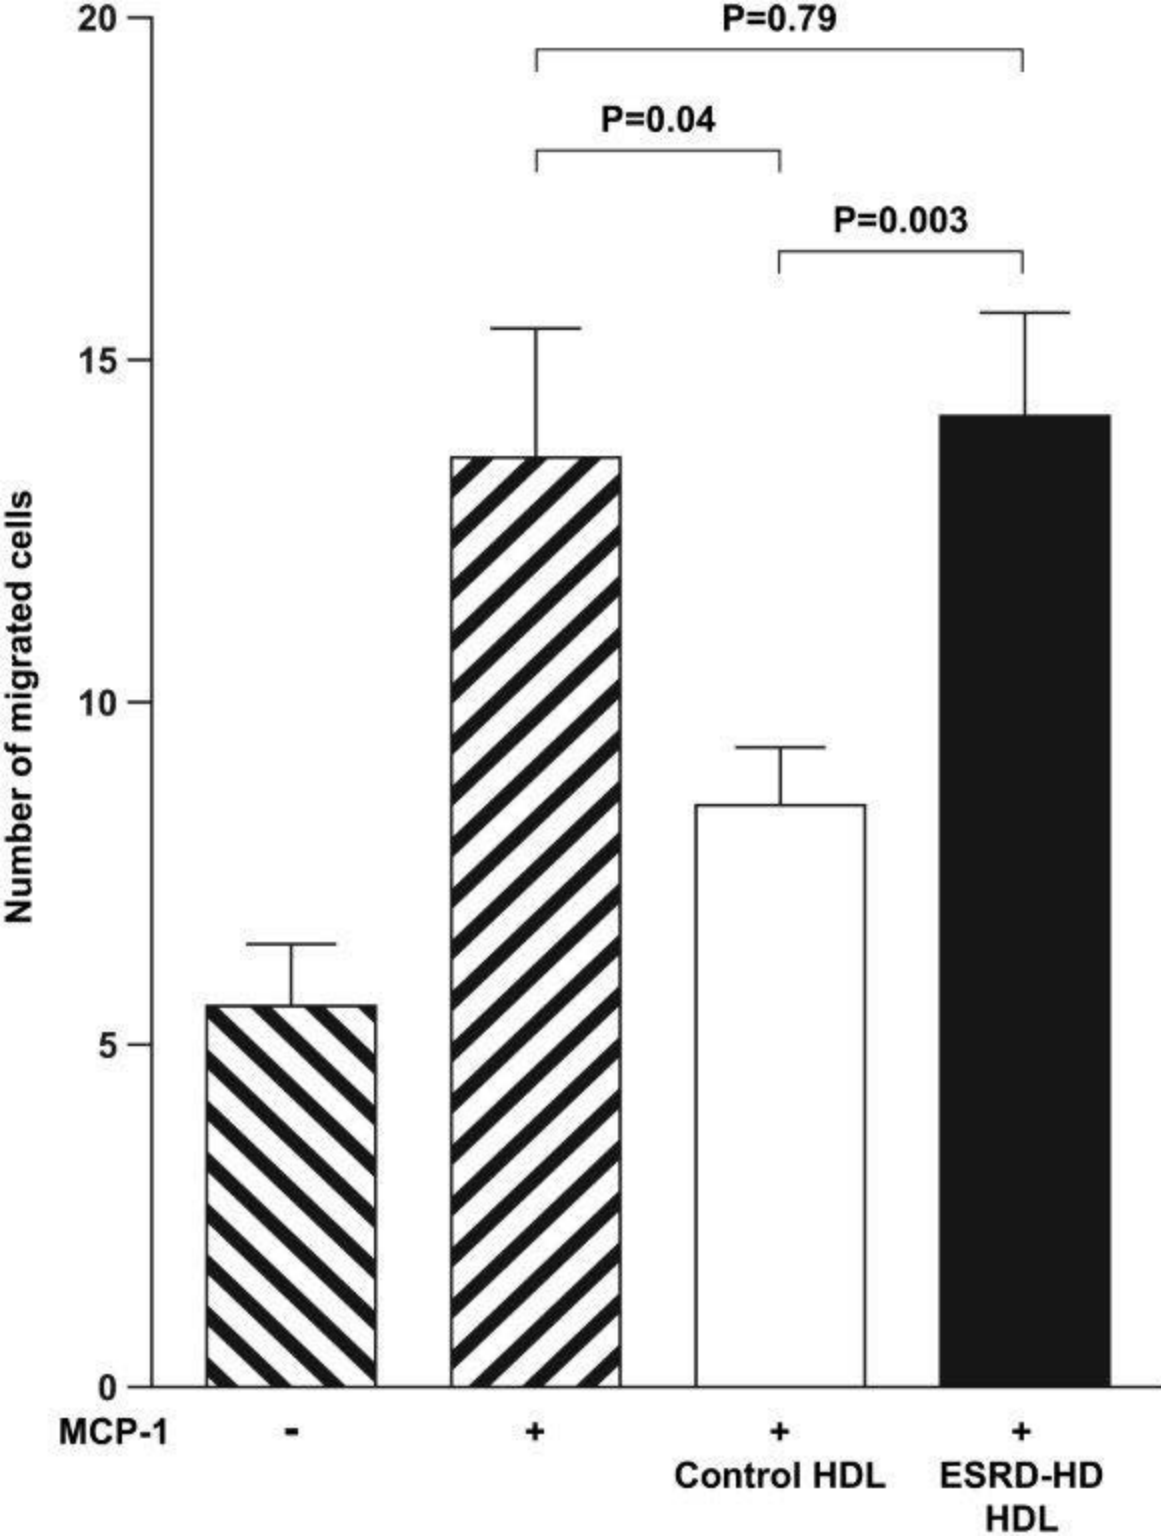

Supplement: NIHMS1846406-supplement-Appendix.pdf [file NIHMS1846406-supplement-Appendix.pdf]
